# Supplementary material
Source: PubMed Central journal article supplement (PMC6391659)
Supplement: ba025692-suppl1.pdf [file ba025692-suppl1.pdf]

## Supplementary Figures

List of supplementary figures:

Figure S1: Effect of anti-FH mAbs in the sheep erythrocyte hemolytic assay.

Figure S2: Epitope mapping and cross-reactivity of anti-FH.07.

Figure S3: Inhibition of complement-mediated hemolysis of sheep erythrocytes by anti-FH.07 or eculizumab in *CFHRI*<sup>-/-</sup> serum.

### Figure S1

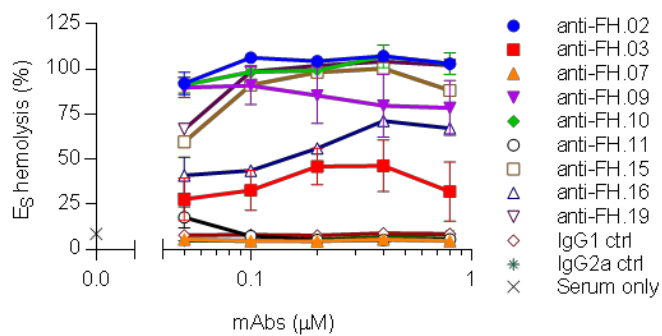

**Figure S1. Effect of anti-FH mAbs in the sheep erythrocyte hemolytic assay.** Sheep erythrocytes ( $E_s$ ) were incubated in 10% (v/v) normal human serum with the indicated mAbs at 37°C for 75 minutes. Hemolysis was measured as absorbance at 412 nm, corrected for background absorbance measured at 690 nm and expressed as percentage of the control lysis ( $E_s$  incubated with 0.6% (w/v) saponin). Data are presented as mean with standard deviation (n=2).

**Figure S2**

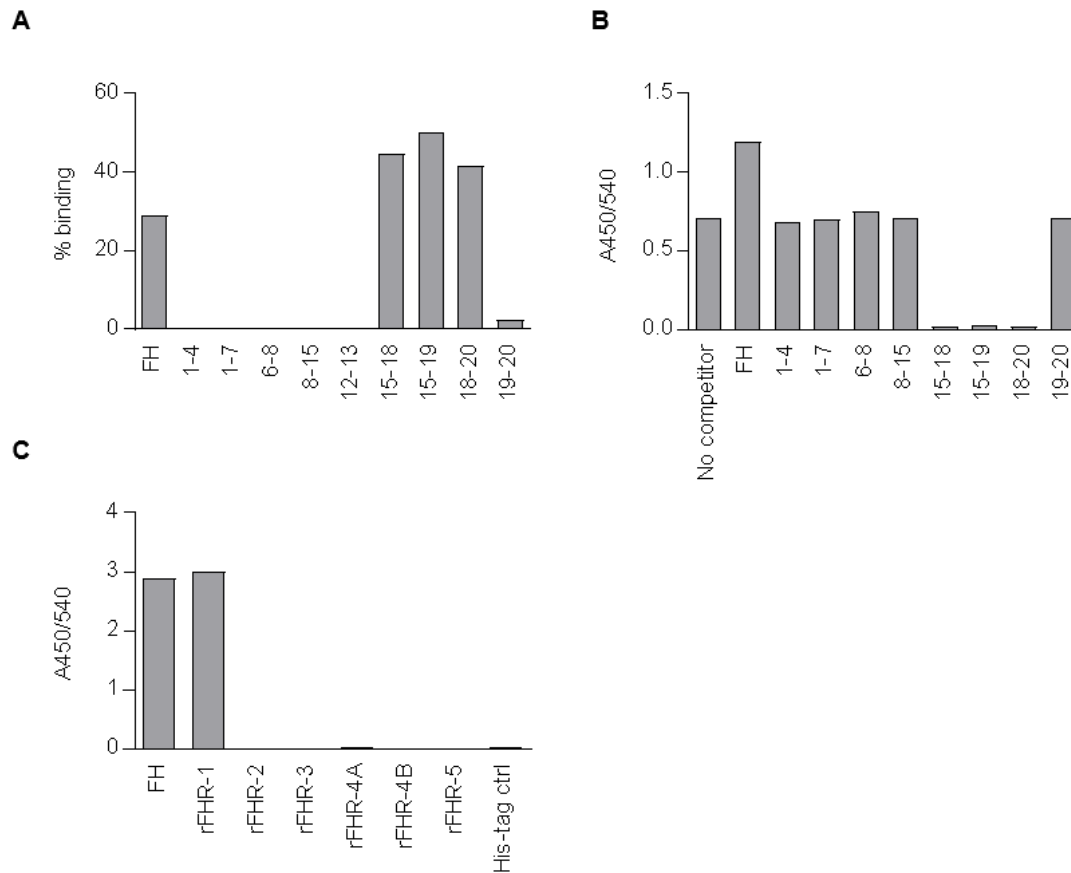

**Figure S2. Epitope mapping and cross-reactivity of anti-FH.07.** (A) Binding of  $^{125}\text{I}$ -labeled FH and fragments of FH to anti-FH.07 was assessed by radioimmunoassay (RIA). Percentage binding was calculated based on the total input. (B) ELISA-based competition assay using biotinylated FH and unbiotinylated FH or FH fragments. Binding of biotinylated FH in the presence of 100-fold excess of indicated competitors, determined by ELISA. (C) Binding of biotinylated FH or recombinant FHR proteins to anti-FH.07, determined by ELISA.

**Figure S3**

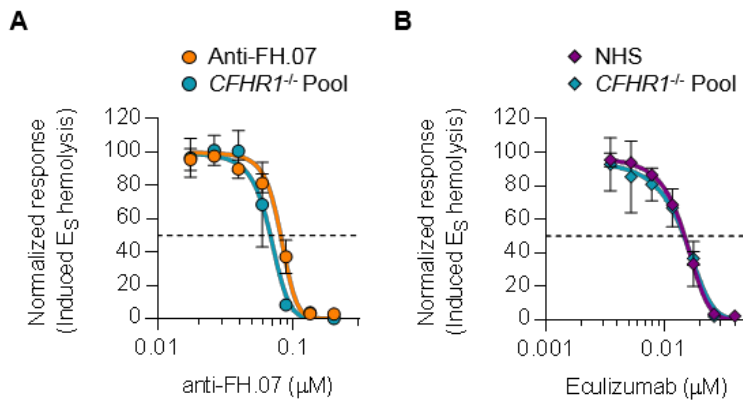

**Figure S3. Inhibition of complement-mediated hemolysis of sheep erythrocytes by anti-FH.07 or eculizumab in *CFHR1*<sup>-/-</sup> serum.** Sheep erythrocyte (E<sub>S</sub>) hemolysis was induced with anti-FH.09, using either a NHS pool or a pool of sera from 4 healthy donors with a homozygous deletion of *CFHR1* (*CFHR1*<sup>-/-</sup> pool). Anti-FH.07 (A) or eculizumab (B) were added at indicated concentrations. Horizontal dashed lines indicate 50% of the inhibition. All data (n=3) are presented as mean with standard deviation.
